# Supplementary material
Source: PubMed Central journal article supplement (PMC6746433)
Supplement: NIHMS1509235-supplement-1.pdf [file NIHMS1509235-supplement-1.pdf]

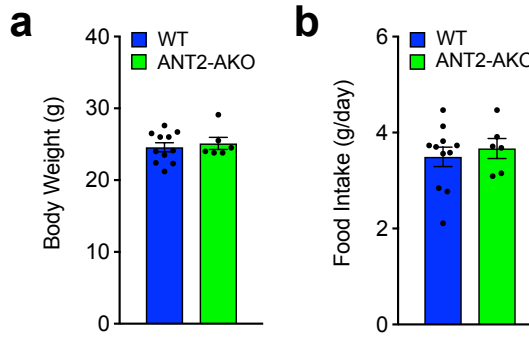

**Supplementary Fig. 1** Body weight and food intake of NCD ANT2 AKO. (a,b) Body weight (a) and food intake (b) of WT (n=11 mice) and ANT2 AKO (n=6 mice) mice fed NCD. Data are presented as mean +/- SEM.

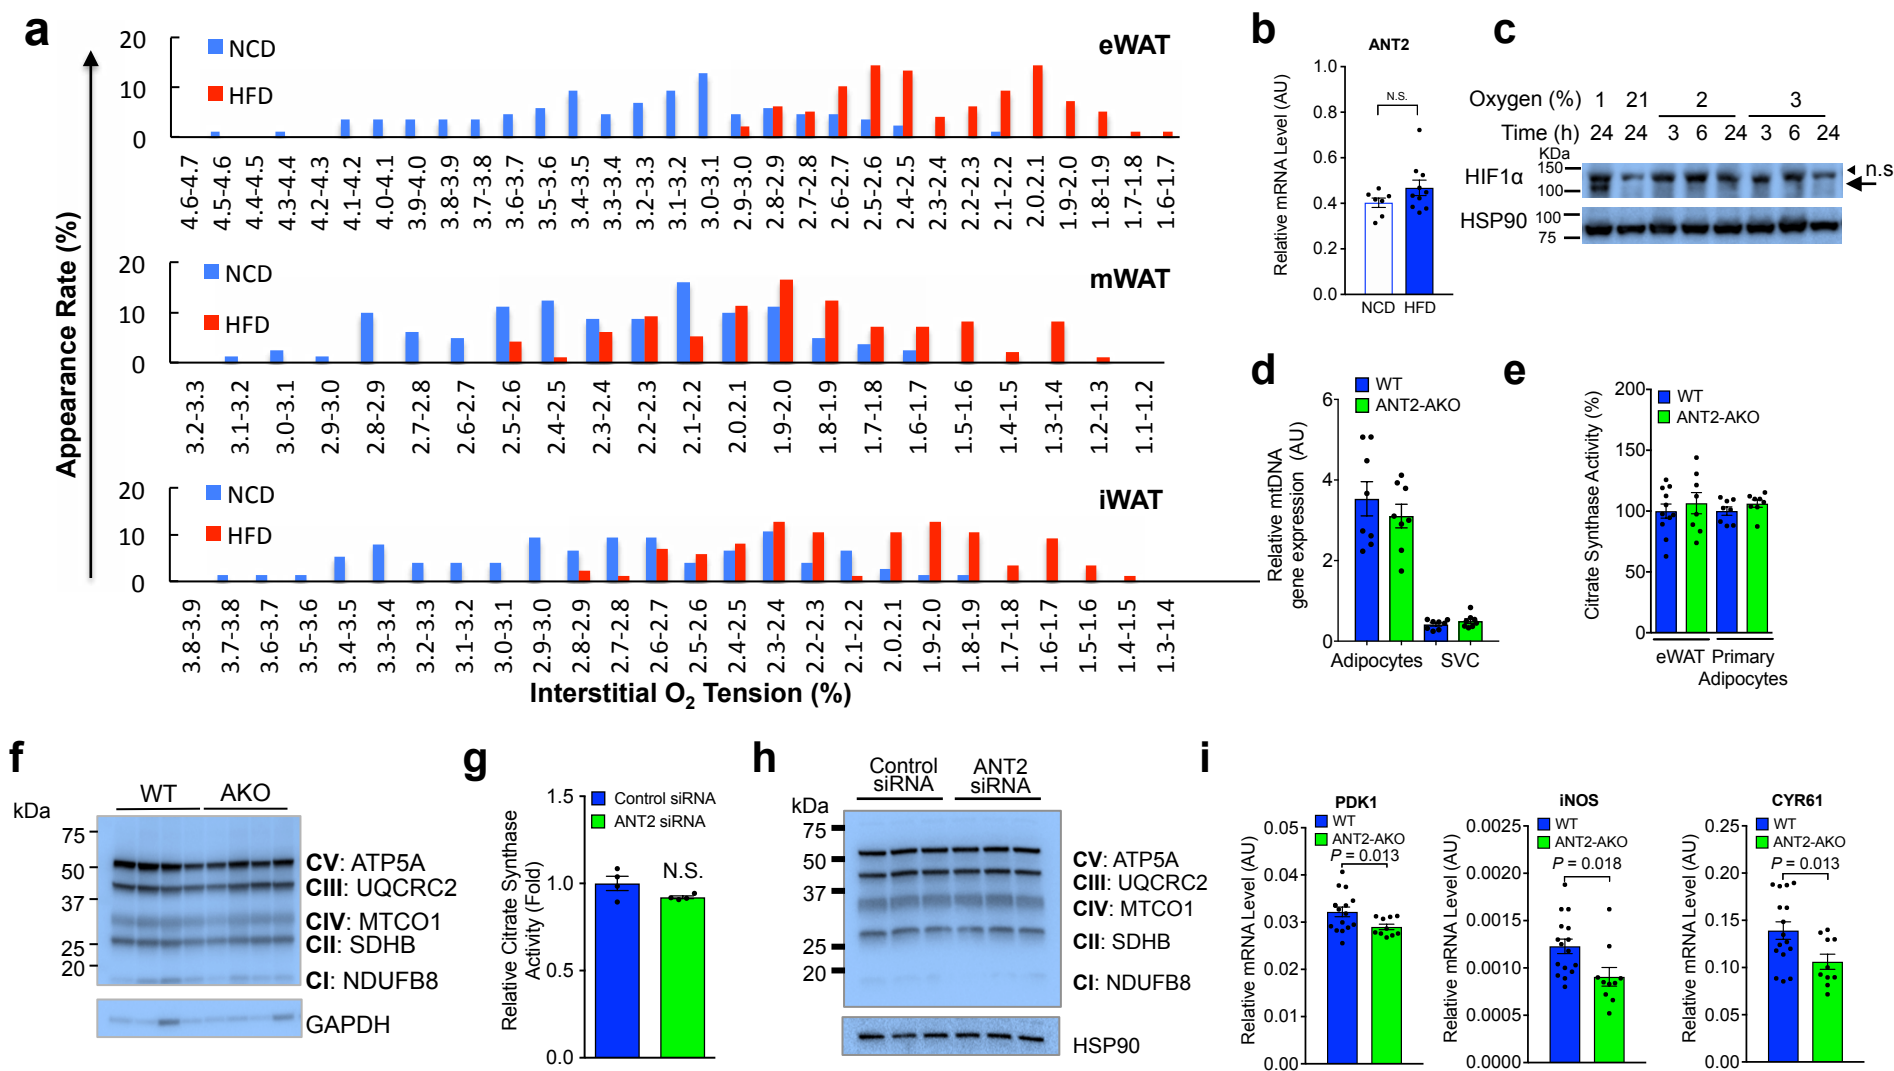

**Supplementary Fig. 2** Interstitial adipose tissue  $O_2$  tension in lean and obese mice and effect of ANT2 knockdown on CS activity and electron transport chain complex component expression in differentiated 3T3-L1 adipocytes. **(a)** Interstitial  $O_2$  tension at different sites of eWAT, iWAT and mWAT in NCD and HFD WT mice ( $n=4$  mice per group). **(b)** *Ant2* mRNA expression in NCD and HFD WT mouse eWAT ( $n=7$  NCD and 8 HFD mice). N.S., not significant ( $P=0.122$ ). **(c)** Western blot analysis of HIF-1 $\alpha$  expression in 3T3-L1 adipocytes incubated at different  $O_2$  conditions for 3, 6, or 24h. n.s., non-specific band. Similar results were obtained in at least two independent experiments. **(d)** Mitochondrial DNA content in primary adipocytes and SVC of WT and ANT2 AKO mice fed HFD ( $n=8$  mice per group). **(e)** Citrate synthase activity in eWAT and primary adipocytes of WT and ANT2 AKO mice fed HFD ( $n=8$  mice per group). **(f)** Western blot of analysis of OXPHOS mitochondrial complex components in primary adipocytes from HFD WT and ANT2 AKO mice. **(g,h)** Citrate synthase activity (**g**;  $n=4$  mice per group) and expression of the electron transport chain complex components (**h**;  $n=3$  mice per group) were measured in 3T3-L1 adipocytes transfected with control and anti-ANT2 siRNAs. N.S., not significant ( $P=0.147$ ). Statistical analyses were performed by the two-tailed Student's *t* test. **(i)** mRNA levels of HIF-1 $\alpha$  target genes in eWAT of HFD WT ( $n=16$  mice) and ANT2 AKO mice ( $n=10$  mice). In panels **b**, **g** and **i**, statistical analyses were performed by the two-tailed Student's *t* test. All data are presented as mean  $\pm$  SEM.

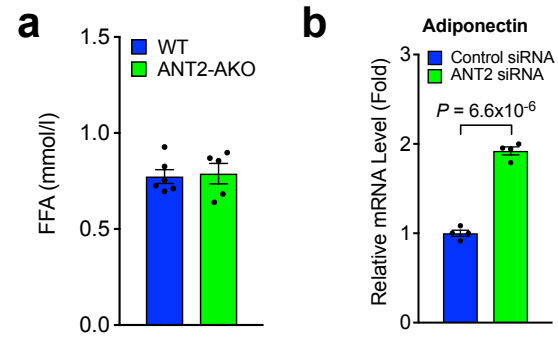

**Supplementary Fig. 3 (a)** Plasma FFA levels in 6h-fasted HFD WT (n=6 mice) or ANT2 AKO (n=5 mice) mice. Statistical analyses were performed by the two-tailed Student's *t* test. Data are presented as mean  $\pm$  SEM. **(b)** Adiponectin mRNA expression in control and ANT2 KD 3T3-L1 adipocytes (n=4 wells/ group). Statistical analyses were performed by the two-tailed Student's *t* test. Data are presented as mean  $\pm$  SEM.

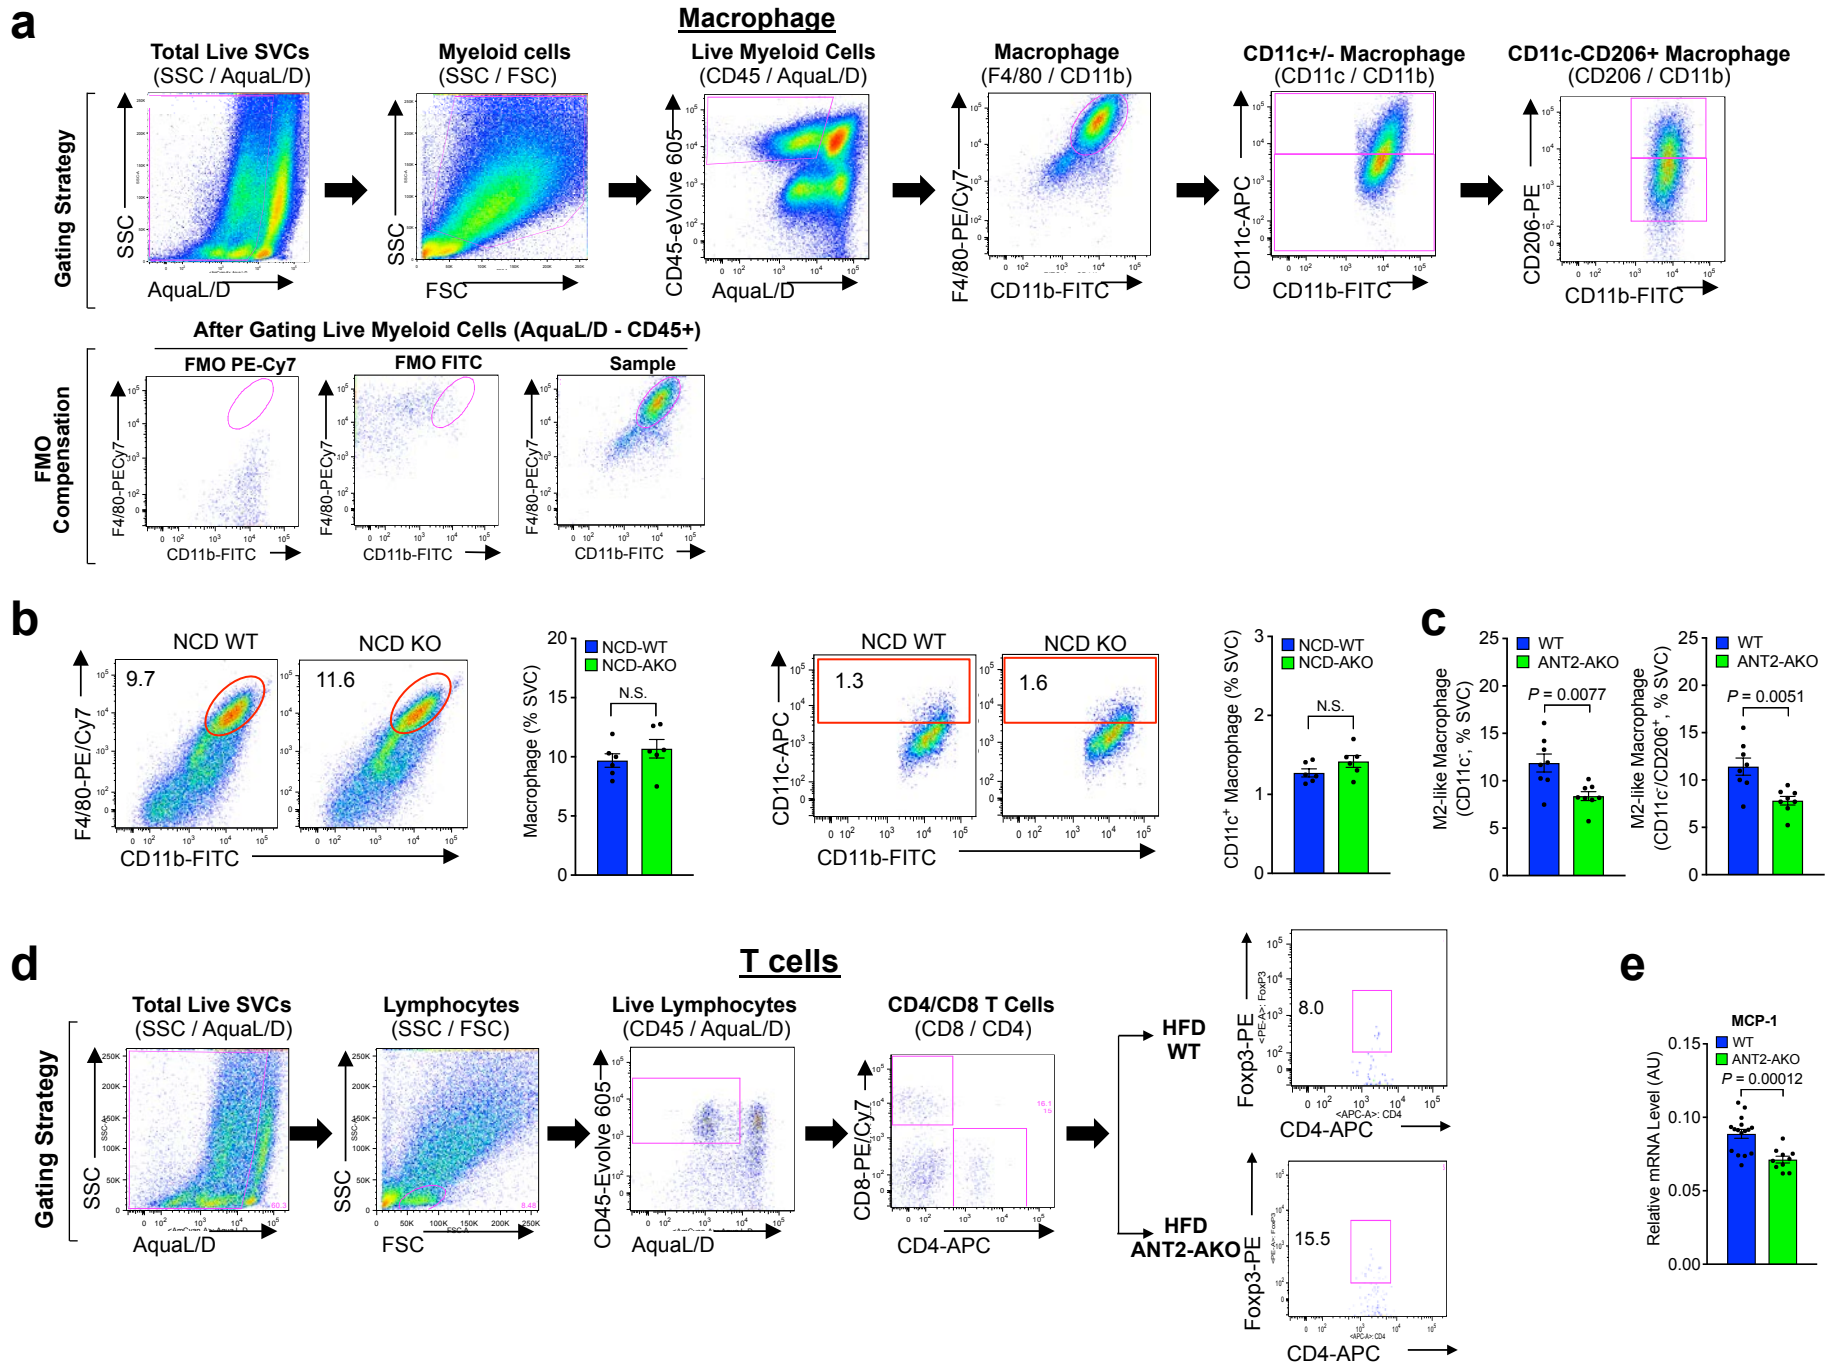

Supplementary Figure 4

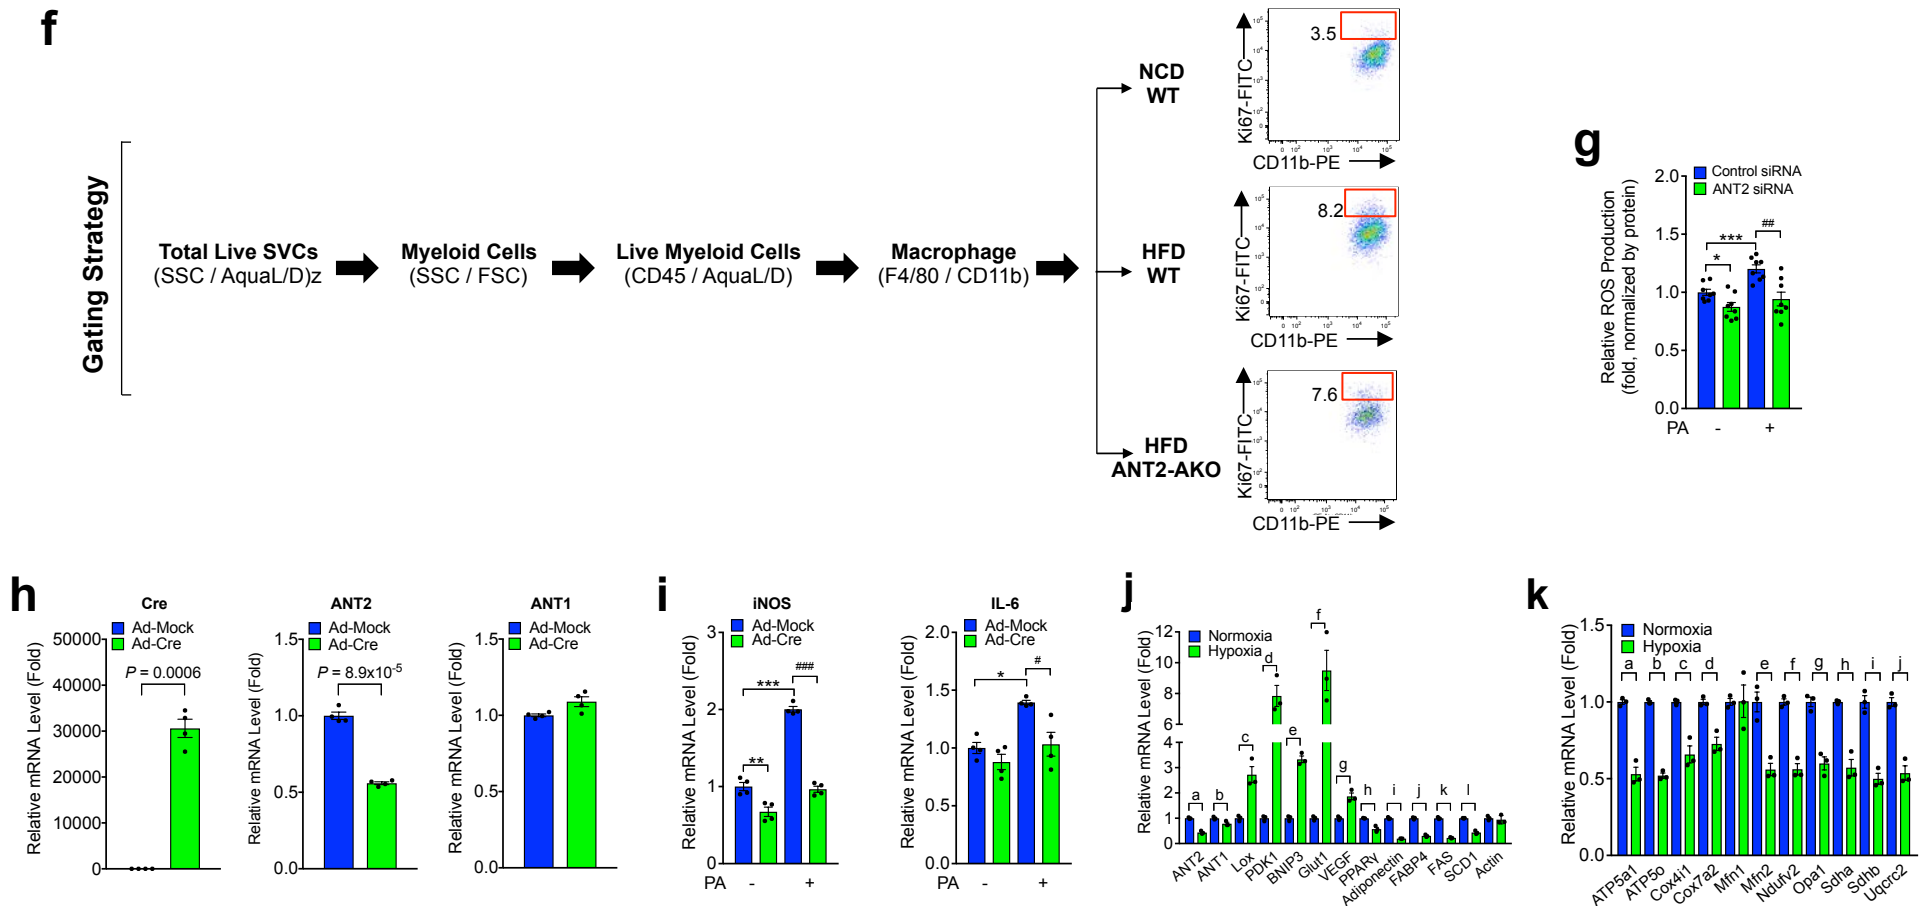

**Supplementary Fig. 4** Flow cytometry analysis of ATMs of HFD WT and ANT2 AKO mice and inflammatory gene expression in WT and ANT2 KO adipocytes. (a) Upper panel: Gating strategy of the flow cytometry analysis of eWAT SVCs for macrophages. Bottom panel: FMO compensation. (b) Ratio of total or CD11c<sup>+</sup> ATM population in SVCs of NCD WT or ANT2 AKO eWAT (n=6 mice per group). N.S., not significant (left,  $P=0.331$ ; right,  $P=0.145$ ). Statistical analyses were performed by the two-tailed Student's *t* test. (c) M2-like polarized macrophages population in the eWAT of HFD WT and ANT2 AKO mice (left, CD11b<sup>+</sup> / F4/80<sup>+</sup> / CD11c<sup>-</sup>; right, CD11b<sup>+</sup> / F4/80<sup>+</sup> / CD11c<sup>-</sup> / CD206<sup>+</sup>) (n=8 mice per group). Statistical analyses were performed by the two-tailed Student's *t* test. (d) Gating strategy of the flow cytometry analysis of eWAT SVCs for Treg cells. (e) mRNA levels of MCP-1 in primary adipocytes from eWAT of HFD WT (n=16 mice) and ANT2 AKO (n=10 mice) mice. Statistical analyses were performed by the two-tailed Student's *t* test. (f) Gating strategy for the flow cytometry analysis of eWAT SVCs for Ki67<sup>+</sup> ATMs. (g) ROS levels in 3T3-L1 adipocytes transfected with control or anti-ANT2 siRNAs and incubated in the presence and absence of high palmitate media (PA; 400 μM) (n=8 wells of cells per group). \* $P=0.019$ , \*\*\* $P=0.00047$ , ### $P=0.0028$ . Statistical analyses were performed by the two-tailed Student's *t* test. (h,i) Effects of ANT2 deletion on inflammatory gene expression in primary adipocytes. Preadipocytes isolated from iWAT of ANT2<sup>fl/fl</sup> mice were differentiated into adipocytes by stimulating them with a hormonal cocktail. Control (Ad-Mock) or Cre expressing adenovirus (Ad-Cre) was infected into these adipocytes, which was followed by incubation in no or high palmitate medium for 24 h (n=4 wells per group). mRNA expression of *Cre*, *Ant1* and *Ant2* (h) and *Nos2* and *Il6* (i) was measured by qRT-PCR. For *Nos2*, \*\* $P=0.0068$ , \*\*\* $P=1.1 \times 10^{-5}$ , ### $P=1.3 \times 10^{-6}$ . For *Il6*, \*\* $P=0.0018$ , # $P=0.037$ . Statistical analyses were performed by the two-tailed Student's *t* test. (j,k) mRNA expression in 3T3-L1 adipocytes incubated in normoxic (21% O<sub>2</sub>) or hypoxic (1% O<sub>2</sub>) conditions for 24h (n=3 wells per group). (j) <sup>a</sup> $P=0.0082$ , <sup>b</sup> $P=0.039$ , <sup>c</sup> $P=0.029$ , <sup>d</sup> $P=0.0094$ , <sup>e</sup> $P=0.00083$ , <sup>f</sup> $P=0.023$ , <sup>g</sup> $P=0.016$ , <sup>h</sup> $P=0.024$ , <sup>i</sup> $P=0.00038$ , <sup>j</sup> $P=5.0 \times 10^{-5}$ , <sup>k</sup> $P=4.1 \times 10^{-5}$ , and <sup>l</sup> $P=0.0038$ . (k) <sup>a</sup> $P=0.0049$ , <sup>b</sup> $P=0.00015$ , <sup>c</sup> $P=0.022$ , <sup>d</sup> $P=0.014$ , <sup>e</sup> $P=0.0075$ , <sup>f</sup> $P=0.0016$ , <sup>g</sup> $P=0.023$ , <sup>h</sup> $P=0.014$ , <sup>i</sup> $P=0.00083$ , and <sup>j</sup> $P=0.0025$ . Statistical analyses were performed by the two-tailed Student's *t* test. All data are presented as mean ± SEM.

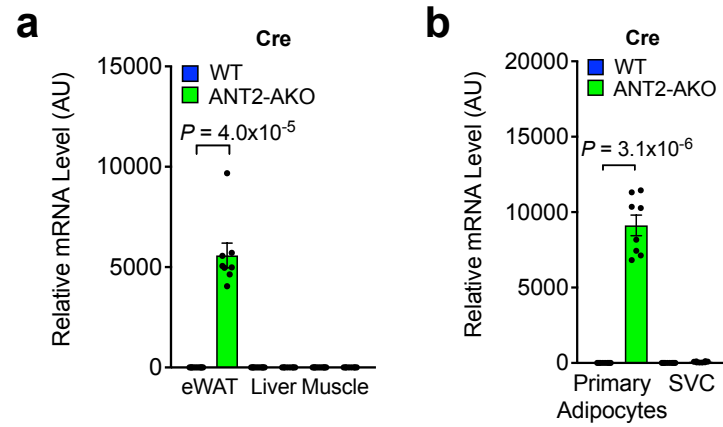

**Supplementary Fig. 5 (a)** Cre mRNA expression in eWAT, liver, or skeletal muscle of HFD WT (n=10) and ANT2 iAKO (n=8) mice. Statistical analyses were performed by two-tailed Student's *t* test. Data are presented as mean +/- SEM. **(b)** Cre mRNA expression in adipocyte or SVC fraction of eWAT of HFD WT (n=10) and ANT2 iAKO (n=8) mice. Statistical analyses were performed by two-tailed Student's *t* test. All data are presented as mean +/- SEM.

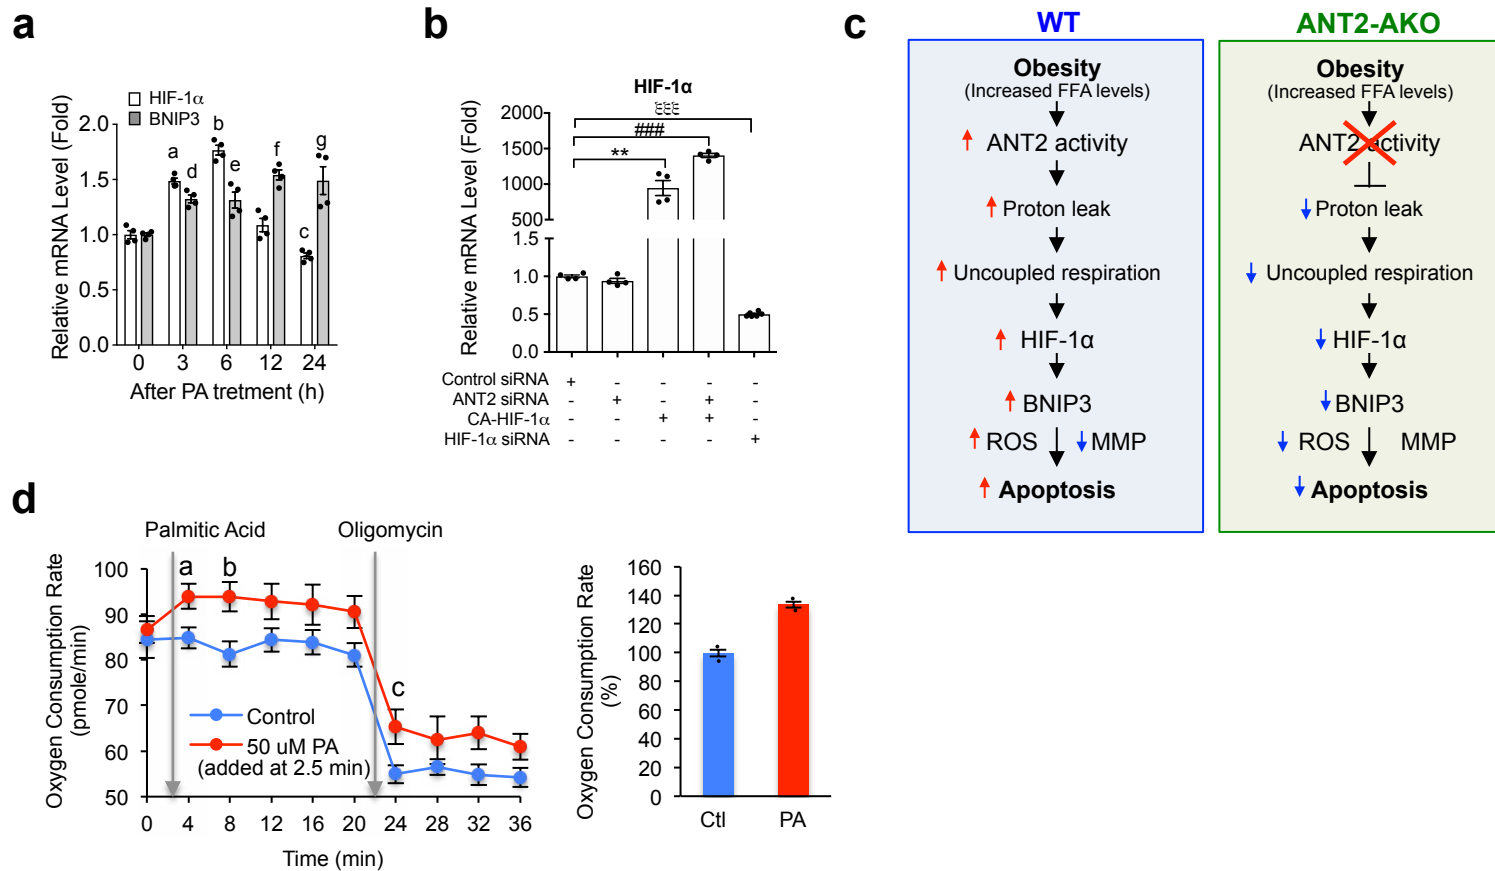

**Supplementary Fig. 6** Effects of high FFA levels and ANT2 knockdown on the expression of adipocyte *Hif1a* and *Bnip3*. **(a)** mRNA expression *Bnip3* and *Hif1a* in 3T3-L1 adipocytes after high palmitate challenge (400 mM) (n=4 wells of cells at each time point). <sup>a</sup>P=7.4x10<sup>-5</sup>, <sup>b</sup>P=1.4x10<sup>-5</sup>, and <sup>c</sup>P=0.0068 vs lane 1; <sup>d</sup>P=0.0098, <sup>e</sup>P=0.020, <sup>f</sup>P=0.00058, and <sup>g</sup>P=0.029 vs lane 2. Statistical analyses were performed by the ANOVA with post-hoc two-tailed Student's *t* test. **(b)** *Hif1a* mRNA expression in 3T3-L1 adipocytes transfected with constitutively active (CA) HIF-1α, anti-ANT2 siRNA and/or anti-HIF-1α siRNA. n=4,4,4, and 6 wells in lane 1 through 5. <sup>\*\*</sup>P=0.0029, <sup>###</sup>P=1.9x10<sup>-5</sup>, and <sup>###</sup>P=1.2x10<sup>-6</sup>. Statistical analyses were performed by the ANOVA with post-hoc two-tailed Student's *t* test. **(c)** Schematic representation of high FFA-induced adipocyte apoptosis. FFA stimulates ANT2-dependent uncoupled mitochondrial respiration by increasing proton leak through ANT2, causing state of relative hypoxia and increased HIF-1α expression. HIF-1α binds to *Bnip3* promoter and increases adipocyte apoptosis. **(d)** Oxygen consumption rate in 3T3-L1 adipocytes was measured before or 1.5 min after adding 50 mM palmitic acid (PA) or thereafter, or without PA treatment using Seahorse XF96 system (left panel) (n=6 wells per group). To measure more acute response to PA, 3T3-L1 adipocyte oxygen consumption rate was measured between 0 and 1 min after 50 mM PA treatment using Clark electrode chamber (right panel) (n=2 runs per group). <sup>a</sup>P=0.035, <sup>b</sup>P=0.043, <sup>c</sup>P=0.018. All statistical analyses were performed by the ANOVA with post-hoc two-tailed t-tests between the individual groups, and all data are presented as mean +/- SEM.



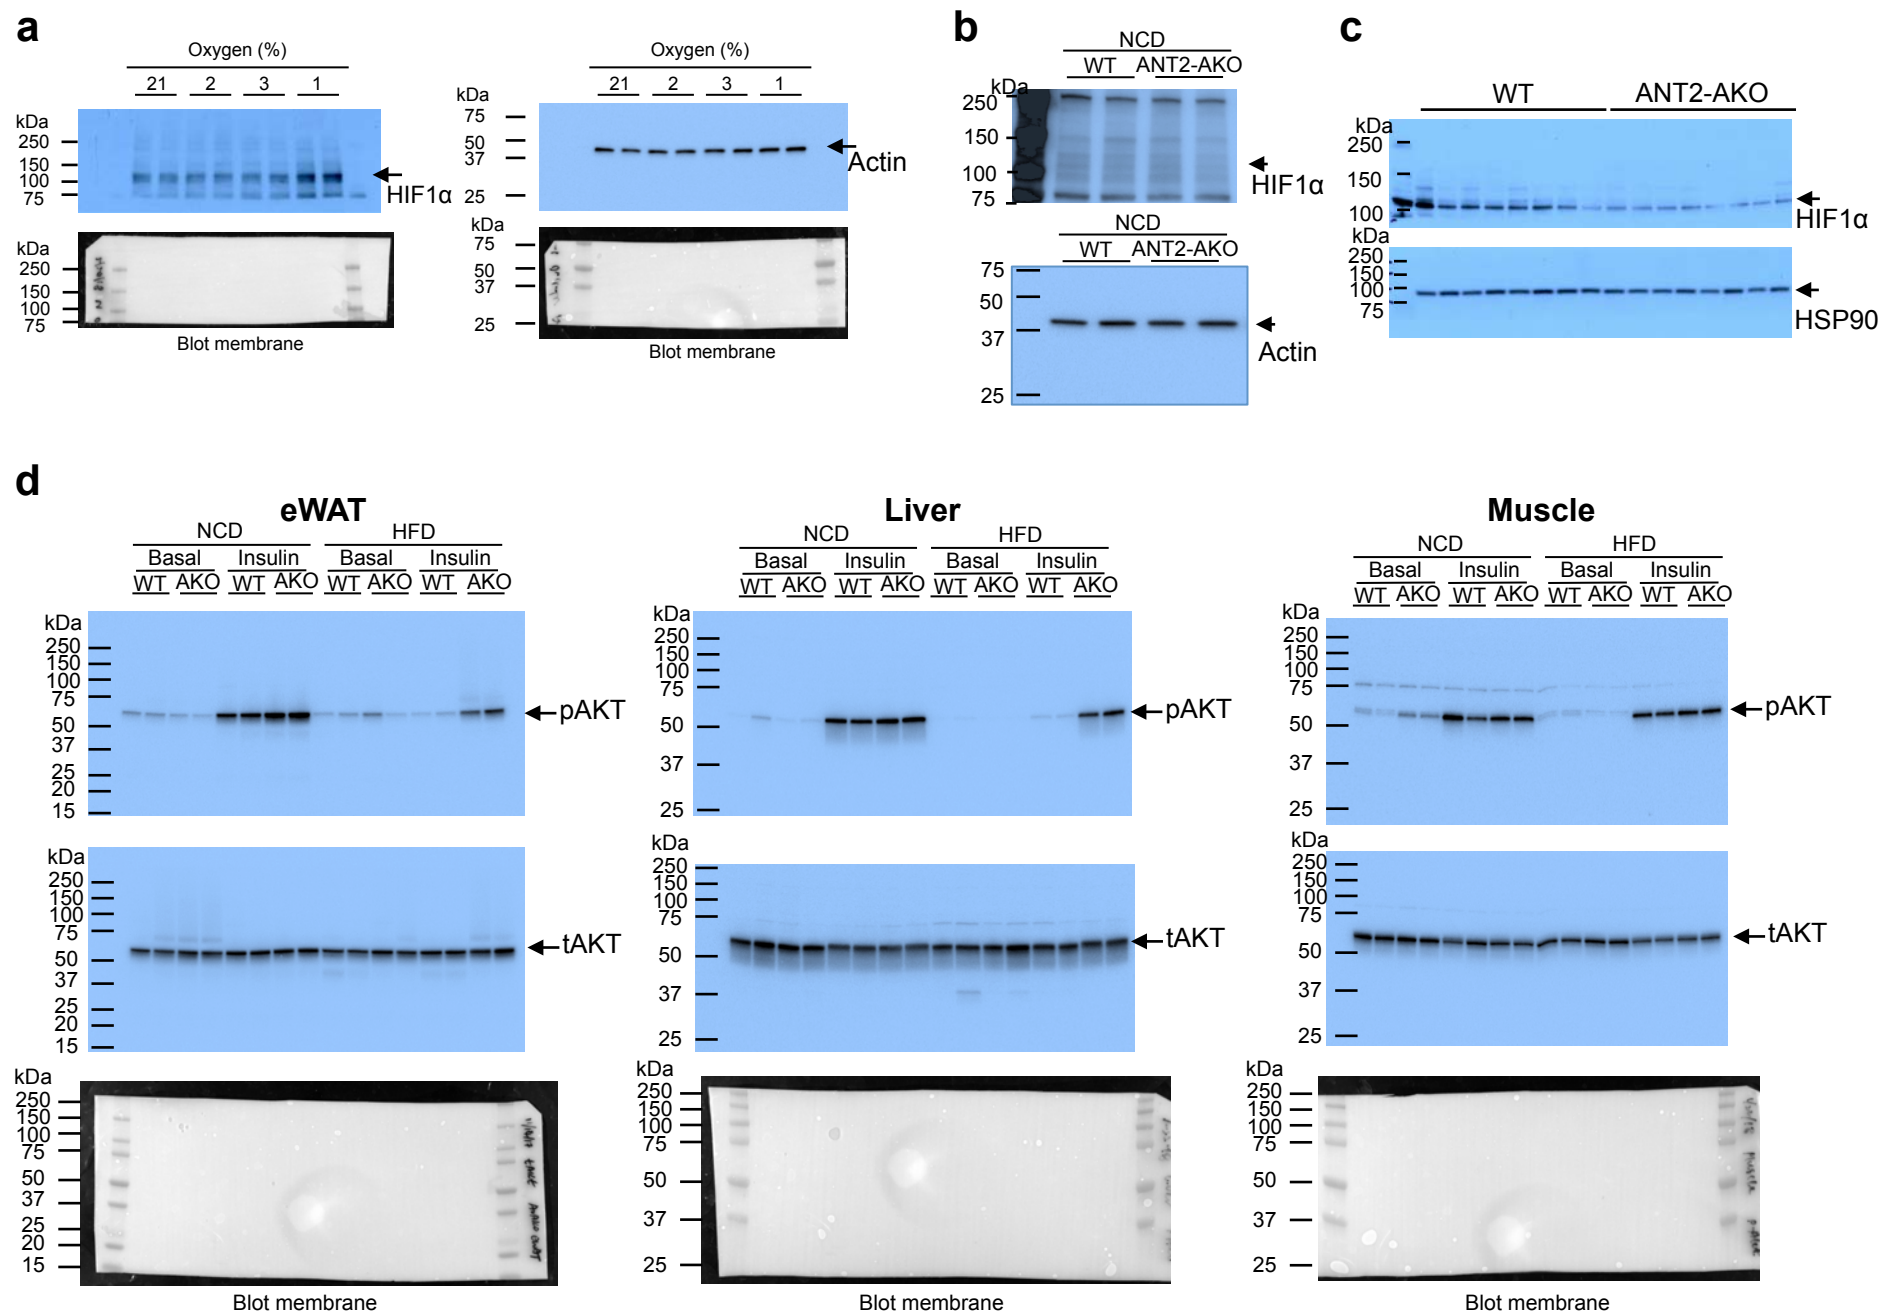

**Supplementary Fig. 7** Raw Western blot images. Original uncropped scan images of Fig. 2g (a), Fig. 2h (b), Fig. 2j (c) and Fig. 3k (d) are shown here.



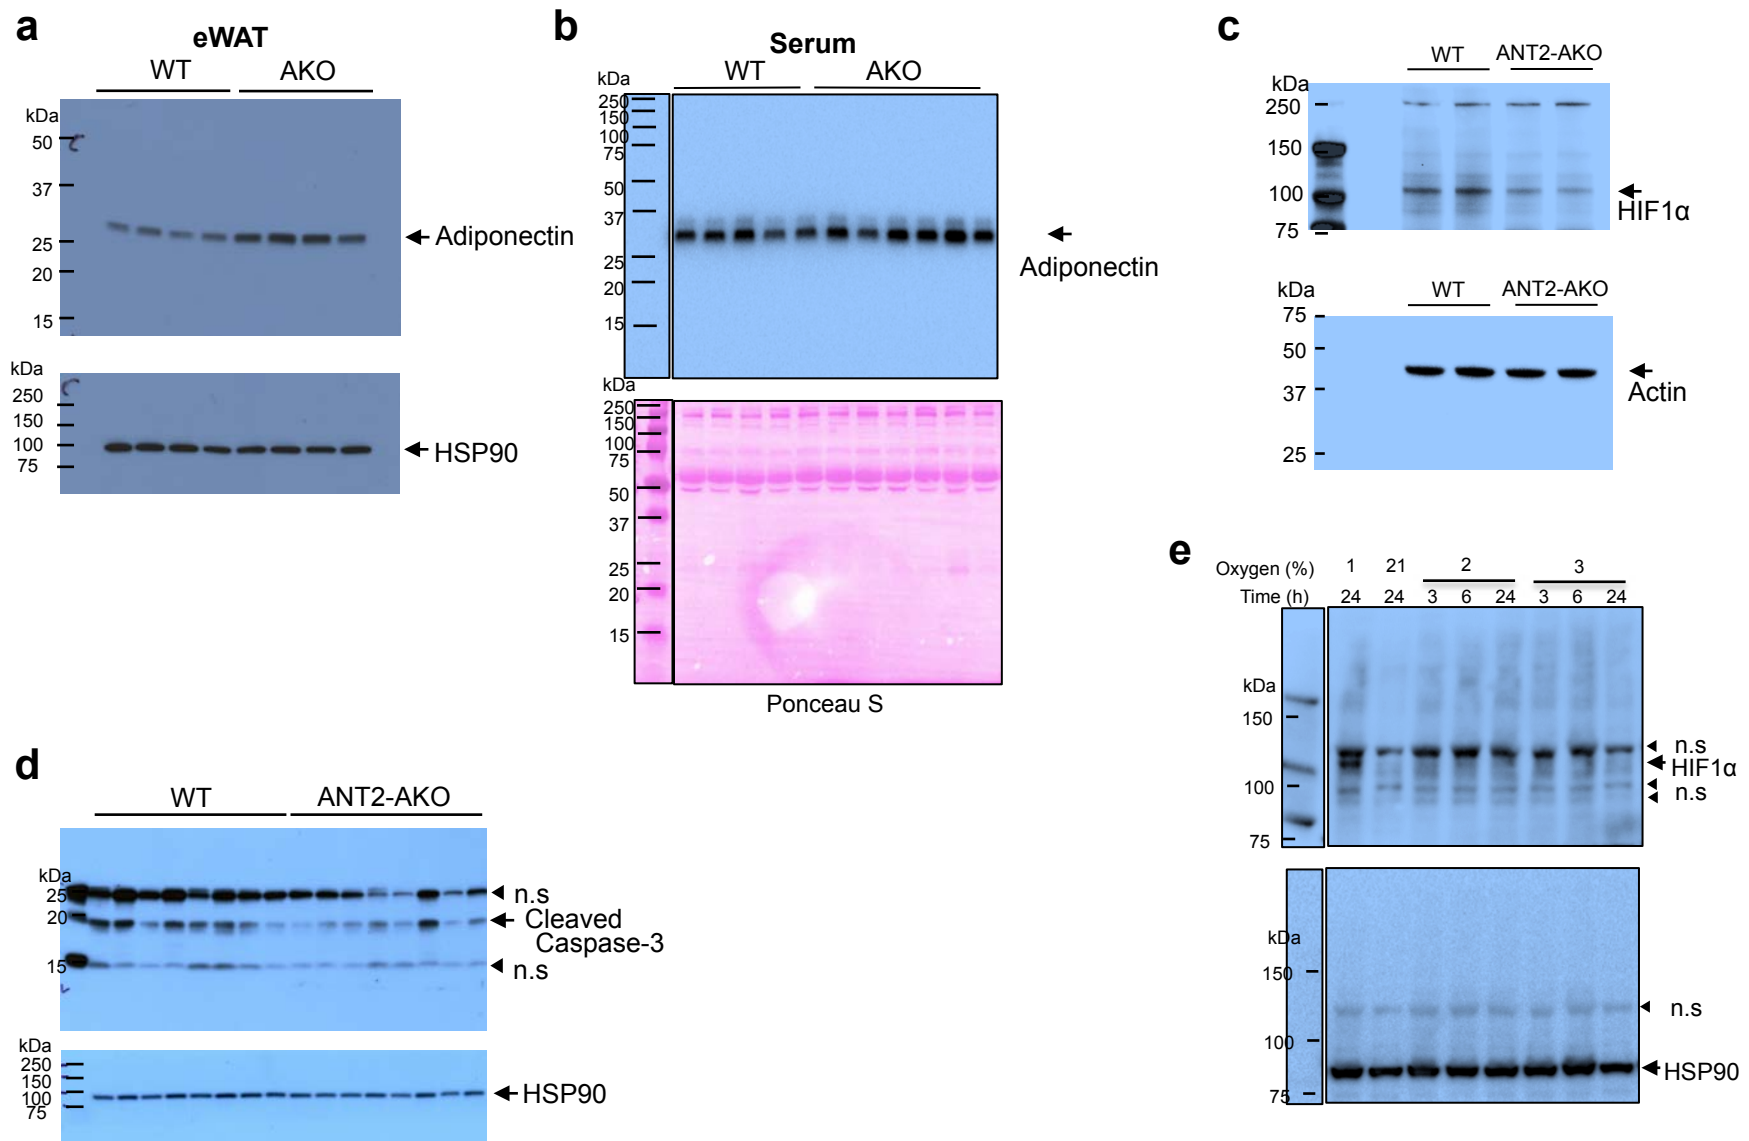

**Supplementary Fig. 8** Raw Western blot data. Original uncropped scan images of Fig. 3m (a), Fig. 3n (b), Fig. 5f (c), Fig. 6b (d), and Supplementary Fig. 2c (e) are shown here.

**Supplementary Table 1. Participant characteristics**

|                                      | Metabolically<br>Normal<br>Lean<br>(n=7) | Metabolically<br>Normal<br>Obese<br>(n=11) | Metabolically<br>Abnormal<br>Obese<br>(n=9) |
|--------------------------------------|------------------------------------------|--------------------------------------------|---------------------------------------------|
| Age (years)                          | 35 ± 4                                   | 34 ± 2                                     | 43 ± 2* <sup>†</sup>                        |
| Sex (Male/Female)                    | 3/4                                      | 1/10                                       | 2/7                                         |
| Body mass index (kg/m <sup>2</sup> ) | 23.4 ± 0.6                               | 36.4 ± 1.2*                                | 38.8 ± 1.6*                                 |
| Body fat (%)                         | 29.8 ± 2.0                               | 47.2 ± 2.2*                                | 48.4 ± 2.0*                                 |
| Fasting glucose (mg/dL)              | 84 ± 2                                   | 87 ± 1                                     | 103 ± 5* <sup>†</sup>                       |
| 2-h OGTT glucose (mg/dL)             | 94 ± 9                                   | 113 ± 5*                                   | 173 ± 9* <sup>†</sup>                       |
| HbA1c (%)                            | 5.0 ± 0.2                                | 5.1 ± 0.1                                  | 5.8 ± 0.3* <sup>†</sup>                     |

Data are means±SEM. OGTT: oral glucose tolerance test. ANOVA revealed a significant main effect of group for age ( $P = 0.034$ ), body mass index ( $P < 0.001$ ), body fat ( $P < 0.001$ ), fasting glucose ( $P < 0.001$ ), 2-h OGTT glucose ( $P < 0.001$ ) and HbA1c ( $P = 0.036$ ). Tukey-Kramer post-hoc analysis revealed the following significant differences: \*Value significantly different from corresponding value in the Metabolically Normal Lean group,  $p < 0.05$ . <sup>†</sup>Value significantly different from corresponding value in the Metabolically Normal Obese group,  $p < 0.05$ .

**Supplementary Table 2. Quantitative Realtime RT-PCR Primer Sequences.**

| Gene full name                        |                                                               | Primers used for real-time QPCR |                            |
|---------------------------------------|---------------------------------------------------------------|---------------------------------|----------------------------|
|                                       |                                                               | Forward                         | Reverse                    |
| Actin                                 | Beta-actin                                                    | GGCTGTATTCCCCTCCATCG            | CCAGTTGGTAACAATGCCATG      |
| Adiponectin                           | Adiponectin, also known as AdipoQ and Acrp30                  | TGTTCTCTTAATCTGCCCCA            | CCAACCTGCACAAGTTCCCTTT     |
| ANT1                                  | Adenine nucleotide translocase 1                              | TCAAGTCGGACGGCCTG               | CACCAGCCCCGCCACCCGT        |
| ANT2                                  | Adenine nucleotide translocase 2                              | TGCTGTCGCTGGCCTGACT             | TGCCCTCGTTGAAAAAGCC        |
| ATP5a1                                | ATP synthase F1 subunit alpha                                 | TCTCCATGGCTCTAACACTCG           | CCAGGTCAACAGACGGTGTGAG     |
| ATP50                                 | ATP synthase subunit O                                        | TCTCGACAGGTTCCGGAGCTT           | TTGACGGTGCCTTGATGTAG       |
| BNIP3                                 | Bcl-2/adenovirus E1B 19kD-interacting protein 3               | ACTCAGATTGGATATGGGATTGG         | GAGACAGTAACAGAGATGGAAGG    |
| CD11b                                 | Cluster of differentiation molecule 11B                       | TGGCCTATACAAGCTTGGCTTT          | AAAGGCCGTTACTGAGGTGG       |
| CD11c                                 | Integrin alpha-X protein                                      | CTGGATAGCCTTTCTTCTGCT           | GCACACTGTGTCCGAACTC        |
| Col1A1                                | Collagen type I alpha 1                                       | GTGCTCCTGGTATTGCTGGT            | GGCTCCTCGTTTTCCTTCTT       |
| Col3A1                                | Collagen type III alpha 1                                     | GGGTTTCCCTGGTCTAAAG             | CCTGGTTTCCCATTTTCTCC       |
| Cox4i1                                | Cytochrome c oxidase subunit 4i1                              | ATTGGCAAGAGACCATTCTAC           | TGGGAAAGCATAGTCTTCACT      |
| Cox7a2                                | Cytochrome c oxidase subunit 7A2                              | GCTGGCCCTTCGTGAGATT             | GGCATCCCATTATCCTCCTGAA     |
| Cre                                   | Cre recombinase                                               | GCATTACCGGTGATGCAACGAGTG        | GAACGCTAGAGCCTGTTTGCACGTTT |
| CYR61                                 | Cysteine-rich angiogenic inducer 61                           | GGATGAATGGTGCCTTGC              | GTCCACATCAGCCCCCTTG        |
| Elastin                               | Elastin                                                       | TGGTATTGGTGGCATCGG              | CCTTGGCTTTGACTCCTGTG       |
| F4/80                                 | F4/80, also known as EMR1 and Ly71                            | CTTTGGCTATGGGCTTCCAGTC          | GCAAGGAGGACAGAGTTTATCGTG   |
| FABP4                                 | Fatty acid binding protein 4                                  | GGATTGGTACCATCCGGT              | CCAGCTTGTACCATCTCGT        |
| FAS                                   | Fatty acid synthase                                           | AGTTCACGGACATGGAGCACAACA        | ATGGTACTTGGCCTTGGGTGTGA    |
| Fibronectin                           | Fibronectin                                                   | CGAGGTGACAGAGACCACAA            | CTGGAGTCAAGCCAGACACA       |
| Glut1                                 | Glucose transporter 1                                         | CCTGTCTCTTCCCTACCCAACC          | GCAGGAGTGTCCGTGTCTTC       |
| HIF-1 $\alpha$                        | Hypoxia-inducible factor 1-alpha                              | CAAGATCTCGGCGAAGCAA             | GGTGAGCCTCAACAGAAGCTTT     |
| HIF-2 $\alpha$                        | Hypoxia-inducible factor 2-alpha                              | TAAAGCGGCAGCTGGAGTAT            | ACTGGGAGGCATAGCACTGT       |
| IL-6                                  | Interleukin 6                                                 | GCTACCAAAGTGGATATAATCAGGA       | CCAGGTAGCTATGGTACTCCAGAA   |
| iNOS                                  | Inducible nitric oxide synthase                               | CTCAGCCCAACAATACAAGAT           | TGTGGTGAAGAGTGTGATGCA      |
| Lox                                   | Lysyl oxidase                                                 | CCACAGCATGGACGAATTCA            | AGCTTGTCTTGTGGCCTTCA       |
| MCP-1                                 | Monocyte chemoattractant protein 1                            | AGGTCCCTGTCATGCTTGTG            | TCTGGACCATTCCTTCTTG        |
| Mfn1                                  | Mitofusin 1                                                   | ATGGCAGAAACGGTATCTCCA           | GCCCTCAGTAACAACTCCAGT      |
| Mfn2                                  | Mitofusin 2                                                   | AGAAGTGGACCCGGTTACCA            | CACTTCGCTGATACCCCTGA       |
| MIP1 $\alpha$                         | Macrophage inflammatory protein 1-alpha                       | CCAAGTCTTCTCAGCGCCAT            | GAATCTTCCGGCTGTAGGAGAAG    |
| Ndufv2                                | NADH:Ubiquinone Oxidoreductase Core Subunit V2                | GCAAGGAATTTGCATAAGACAGC         | TAGCCATCCATTCTGCCTTTG      |
| Opa1                                  | Mitochondrial dynamin like GTPase                             | TGGAAAATGGTTCGAGAGTCAAG         | CATTCCGTCTCTAGGTTAAAGCG    |
| PAI-1                                 | Plasminogen activator inhibitor-1                             | CATGCCCCACTTCTTCAAGCT           | TGGTATGCCTTTCACCCAGT       |
| PDK1                                  | Pyruvate Dehydrogenase Kinase 1                               | GGCCAGGTGGACTTCTATGC            | AGCATTCACTGACCCGAAGT       |
| PPAR $\gamma$                         | Peroxisome proliferator activated receptor gamma              | TCGCTGATGCACTGCCTATG            | GAGAGGTCCACAGAGCTGATT      |
| Rantes                                | Regulated on activation, normal T cell expressed and secreted | GCAAGTGCTCCAATCTTGCA            | CTTGGCGGTTCTTTCGAGT        |
| SCD1                                  | Stearoyl-CoA desaturase 1                                     | CCACCCTCTTACAAAGCTC             | CACGAGCCCATTCATAGACA       |
| Sdha                                  | Succinate dehydrogenase complex flavoprotein subunit A        | GGAACACTCCAAAAACAGACCT          | CCACCACTGGGTATTGAGTAGAA    |
| Sdhb                                  | Succinate Dehydrogenase Complex Iron Sulfur Subunit B         | ATTTACCGATGGGACCCAGAC           | GTCCGCACTTATTGAGTCCAC      |
| TNF $\alpha$                          | Tumor necrosis factor alpha                                   | CATCTTCTCAAAAATTCGAGT           | TGGGAGTAGACAAGGTACAA       |
| Uqcrc2                                | Ubiquinol-cytochrome c reductase core protein 2               | AAAGTTGCCCCGAAGGTTAAA           | GAGCATAGTTTTCCAGAGAAGCA    |
| VEGF                                  | Vascular endothelial growth factor                            | TACCTCCACCATGCCAAGTGGT          | AGGACGGCTGAAGATGTAC        |
| 36B4                                  | 60S Acidic Ribosomal Protein P0                               | GGCCCTGCACTCTCGCTTTC            | TGCCAGGACCGCCTTGT          |
| Primers used for mtDNA content assays |                                                               |                                 |                            |
| GAPDH                                 | Glyceraldehyde 3-phosphate dehydrogenase                      | GGCTCCCTAGGCCCTCCTG             | TCCCAACTCGGCCCAACA         |
| mtDNA                                 | Mitochondrial DNA                                             | CCCAGTACTACCATCATCAAGT          | GATGGTTTGGGAGATTGGTTGATG   |
